# Supplementary material for: Comparison between Puff and Lagrangian Particle Dispersion Models at a Complex and Coastal Site
Source: MDPI journal article supplement (doi:10.3390/atmos13040508), 2022-03-23
Supplement: s1 [file s1]

# Supplementary Materials: Comparison between Puff and Lagrangian Particle Dispersion Models at a Complex and Coastal Site

Alessandro Nanni <sup>1,\*</sup>, Gianni Tinarelli <sup>1</sup>, Carlo Solisio <sup>2</sup> and Cristina Pozzi <sup>1</sup>

<sup>1</sup> ARIANET Srl, Via Gilino, 9, 20128 Milan, Italy; g.tinarelli@aria-net.it (G.T.); c.pozzi@aria-net.it (C.P.)

<sup>2</sup> Dipartimento di Ingegneria Civile, Chimica ed Ambientale, Università Degli Studi Di Genova, Via Montallegro, 1, 16145 Genova, Italy; solisiocarlo@gmail.com

\* Correspondence: a.nanni@aria-net.it; Tel.: +39-02-2700-7255, fax: +39-02-2570-8084

## SUPPORTING MATERIAL

### Table of contents

| Figures                                                                                                                                                                                                                                           |
|---------------------------------------------------------------------------------------------------------------------------------------------------------------------------------------------------------------------------------------------------|
| <b>Caption</b>                                                                                                                                                                                                                                    |
| <b>Figure S1.</b> – Landuse map and distribution of the calculation domain (red square: position of the emissions)<br>Legend: 10 - Urban or Built-up Land; 20 - Agricultural Land (Unirrigated);<br>30 - Rangeland; 40 - Forest Land; 50 – Water. |
| <b>Figure S2.</b> – Point source, annual maximum of normalized hourly concentration ( $\mu\text{g h m}^{-3} \text{ kg}^{-1}$ ). Left: LPM; right: PUM                                                                                             |
| <b>Figure S3.</b> – Volume source, annual maximum of normalized hourly concentration ( $\mu\text{g h m}^{-3} \text{ kg}^{-1}$ ). Left: LPM; right: PUM                                                                                            |
| <b>Figure S4.</b> – Annual average of normalized hourly concentration ( $\mu\text{g h m}^{-3} \text{ kg}^{-1}$ ) versus ground elevation above: point source; below: volume source; red: PUM; blue: LPM                                           |
| Tables                                                                                                                                                                                                                                            |
| <b>Table S1.</b> – Synthetic statistics of annual mean normalized concentrations calculated by PuM and LPM in $\mu\text{g h}/(\text{kg}\cdot\text{m}^3)$ except IA, dimensionless.                                                                |
| <b>Table S2.</b> – Volume source. Comparison of statistical indexes of calculated annual averages and maxima as a function of terrain elevation.                                                                                                  |
| <b>Table S3.</b> – Volume source. Comparison of statistical indexes of calculated annual averages and maxima as a function of distance from the source.                                                                                           |
| <b>Table S4.</b> – Volume source. Comparison of statistical indexes of calculated annual averages and maxima as a function of landuse.                                                                                                            |
| <b>Table S5.</b> – Point source. Comparison of statistical indexes of calculated annual averages and maxima as a function of terrain elevation.                                                                                                   |
| <b>Table S6.</b> – Point source. Comparison of statistical indexes of calculated annual averages and maxima as a function of distance from the source.                                                                                            |
| <b>Table S7.</b> – Point source. Comparison of statistical indexes of calculated annual averages and maxima as a function of landuse.                                                                                                             |

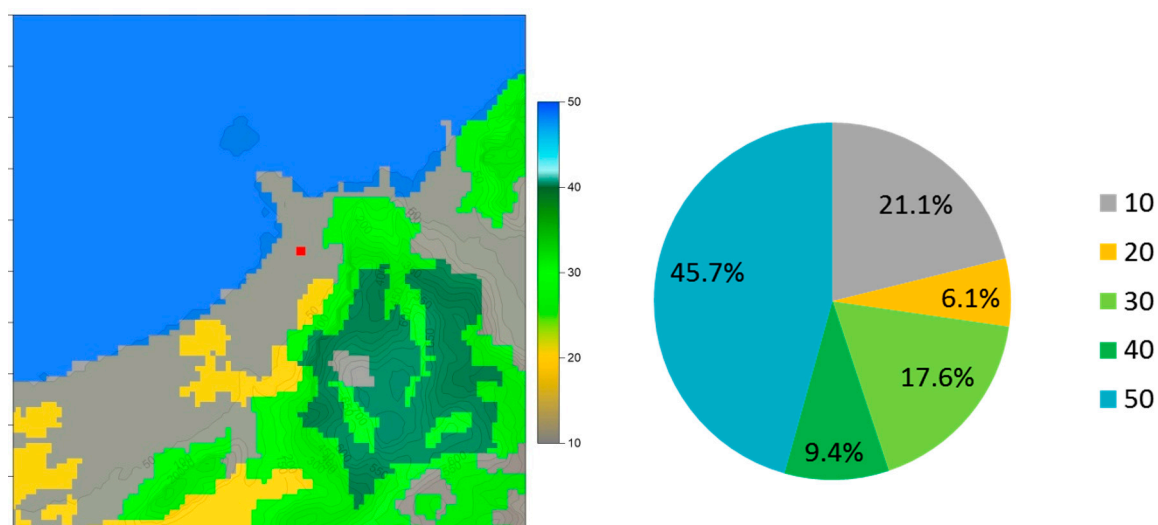

**Figure S1.** Landuse map and distribution of the calculation domain (red square: position of the emissions)  
 Legend: 10 - Urban or Built-up Land; 20 - Agricultural Land (Unirrigated);  
 30 - Rangeland; 40 - Forest Land; 50 - Water.

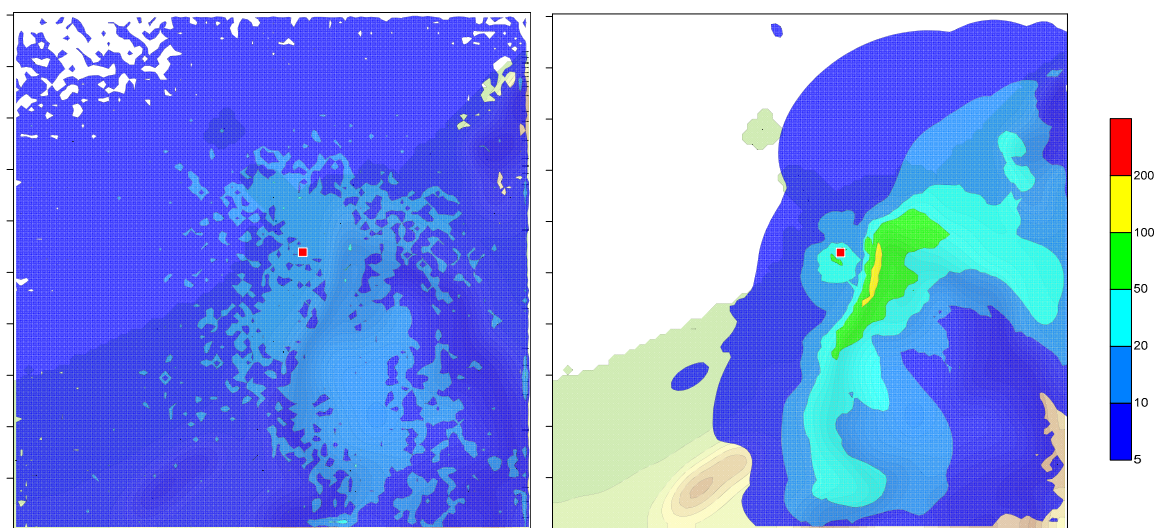

**Figure S2** Point source, annual maximum of normalized hourly concentration ( $\mu\text{g h m}^{-3} \text{ kg}^{-1}$ ). Left: LPM; right: PUM.  
 Red square: source position.

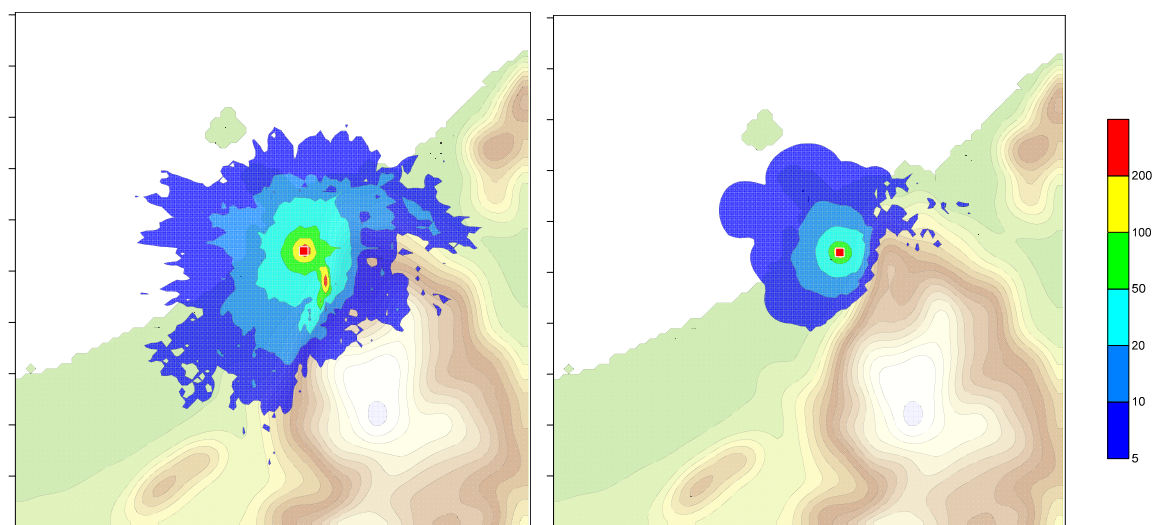

**Figure S3** Volume source, annual maximum of normalized hourly concentration ( $\mu\text{g h m}^{-3} \text{ kg}^{-1}$ ). Left: LPM; right: PUM. Red square: source position.

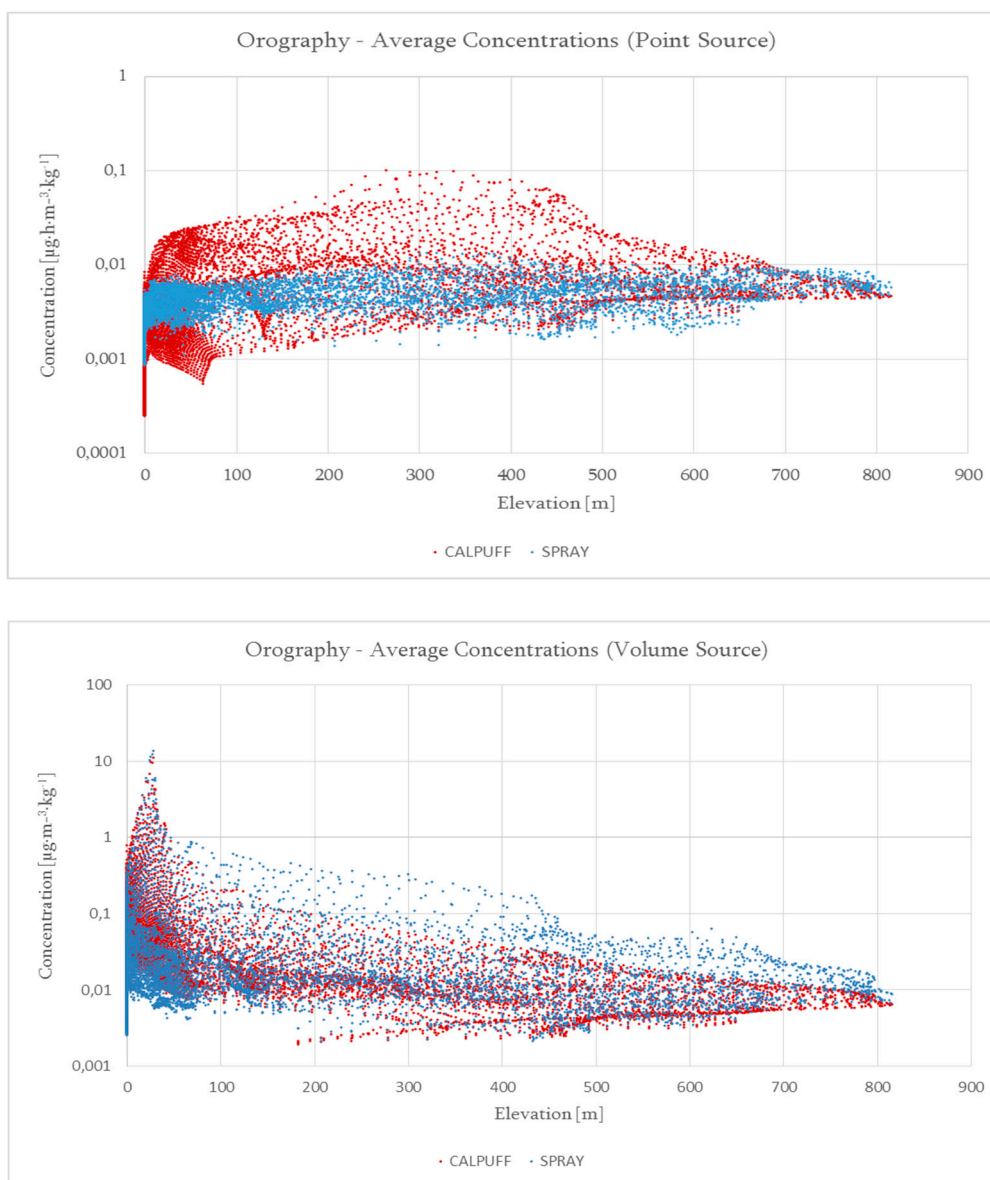

**Figure S4** Annual average of normalized hourly concentration ( $\mu\text{g h m}^{-3} \text{kg}^{-1}$ ) versus ground elevation.

Above: point source; below: volume source.

Red: PUM; blue: LPM

## TABLES

**Table S1** Synthetic statistics of annual mean normalized concentrations calculated by PuM and LPM in  $\mu\text{g h}/(\text{kg}\cdot\text{m}^3)$  except IA, dimensionless.

| Statistics    | Volume Source |        | Point Source |       |
|---------------|---------------|--------|--------------|-------|
|               | LPM           | PuM    | LPM          | PuM   |
| Min           | 0.            | 0.002  | 0.           | 0.    |
| Percentile 25 | 0.008         | 0.012  | 0.002        | 0.001 |
| Median        | 0.015         | 0.026  | 0.003        | 0.003 |
| Percentile 75 | 0.031         | 0.054  | 0.005        | 0.006 |
| Max           | 13.600        | 10.897 | 0.013        | 0.100 |
| Mean          | 0.054         | 0.069  | 0.004        | 0.006 |
| IA            | 0.981         |        | 0.672        |       |

**Table S2** Volume source. Comparison of statistical indexes of calculated annual averages and maxima as a function of terrain elevation.

| Orography [m] | FAC1          |           | IA            |           |
|---------------|---------------|-----------|---------------|-----------|
|               | Average Conc. | Max Conc. | Average Conc. | Max Conc. |
| 0-100         | 0.715         | 0.896     | 0.982         | 0.824     |
| 100-200       | 0.958         | 0.247     | 0.707         | 0.171     |
| 200-300       | 0.926         | 0.276     | 0.570         | 0.251     |
| 300-400       | 0.919         | 0.426     | 0.510         | 0.216     |
| 400-500       | 0.975         | 0.288     | 0.605         | 0.214     |
| 500-600       | 0.985         | 0.281     | 0.663         | 0.214     |
| 600-700       | 0.967         | 0.113     | 0.454         | 0.072     |
| > 700         | 1.000         | 0.027     | 0.315         | 0.016     |
| Global        | 0.797         | 0.680     | 0.981         | 0.734     |

**Table S3** Volume source. Comparison of statistical indexes of calculated annual averages and maxima as a function of distance from the source.

| Distance From Source [km] | FAC1          |           | IA            |           |
|---------------------------|---------------|-----------|---------------|-----------|
|                           | Average Conc. | Max Conc. | Average Conc. | Max Conc. |
| 0.0-0.5                   | 1.000         | 0.988     | 0.974         | 0.594     |
| 0.5-1.0                   | 0.783         | 0.689     | 0.813         | 0.023     |
| 1.0-1.5                   | 0.913         | 0.714     | 0.765         | 0.122     |
| 1.5-2.0                   | 0.882         | 0.747     | 0.677         | 0.110     |
| 2.0-3.0                   | 0.809         | 0.712     | 0.613         | 0.301     |
| > 3.0                     | 0.781         | 0.663     | 0.567         | 0.470     |

**Table S4** Volume source. Comparison of statistical indexes of calculated annual averages and maxima as a function of landuse.

| Land Use          | FAC1          |           | IA            |           |
|-------------------|---------------|-----------|---------------|-----------|
|                   | Average Conc. | Max Conc. | Average Conc. | Max Conc. |
| Urban Land        | 0.970         | 0.665     | 0.985         | 0.817     |
| Agricultural Land | 0.943         | 0.482     | 0.731         | 0.126     |
| Rangeland         | 0.954         | 0.299     | 0.703         | 0.456     |
| Forest Land       | 0.986         | 0.297     | 0.567         | 0.264     |
| Large Water Body  | 0.606         | 0.971     | 0.876         | 0.885     |
| Barren Land       | 0.869         | 0.150     | 0.695         | 0.417     |

**Table S5** Point source. Comparison of statistical indexes of calculated annual averages and maxima as a function of terrain elevation.

| Orography [m] | FAC1          |           | IA            |           |
|---------------|---------------|-----------|---------------|-----------|
|               | Average Conc. | Max Conc. | Average Conc. | Max Conc. |
| 0-100         | 0.680         | 0.808     | 0.432         | 0.475     |
| 100-200       | 0.728         | 0.684     | 0.194         | 0.217     |
| 200-300       | 0.737         | 0.596     | 0.169         | 0.183     |
| 300-400       | 0.778         | 0.718     | 0.200         | 0.220     |
| 400-500       | 0.779         | 0.820     | 0.186         | 0.260     |
| 500-600       | 0.954         | 0.991     | 0.416         | 0.440     |
| 600-700       | 1.000         | 0.994     | 0.760         | 0.556     |
| > 700         | 1.000         | 1.000     | 0.744         | 0.471     |
| Global        | 0.754         | 0.814     | 0.672         | 0.763     |

**Table S6** Point source. Comparison of statistical indexes of calculated annual averages and maxima as a function of distance from the source.

| Distance From Source [km] | FAC1          |           | IA            |           |
|---------------------------|---------------|-----------|---------------|-----------|
|                           | Average Conc. | Max Conc. | Average Conc. | Max Conc. |
| 0-0.5                     | 0.617         | 0.840     | 0.141         | 0.123     |
| 0.5-1                     | 0.477         | 0.774     | 0.155         | 0.164     |
| 1-1.5                     | 0.425         | 0.679     | 0.162         | 0.176     |
| 1.5-2                     | 0.313         | 0.756     | 0.164         | 0.187     |
| 2-3                       | 0.457         | 0.797     | 0.198         | 0.233     |
| > 3                       | 0.556         | 0.743     | 0.336         | 0.324     |

**Table S7** Point source. Comparison of statistical indexes of calculated annual averages and maxima as a function of landuse.

| Land Use          | FAC1          |           | IA            |           |
|-------------------|---------------|-----------|---------------|-----------|
|                   | Average Conc. | Max Conc. | Average Conc. | Max Conc. |
| Urban Land        | 0.716         | 0.710     | 0.243         | 0.346     |
| Agricultural Land | 0.949         | 0.770     | 0.394         | 0.295     |
| Rangeland         | 0.806         | 0.783     | 0.215         | 0.265     |
| Forest Land       | 0.919         | 0.947     | 0.241         | 0.351     |
| Large Water Body  | 0.678         | 0.853     | 0.524         | 0.408     |
| Barren Land       | 0.830         | 0.820     | 0.227         | 0.196     |
